# Supplementary material
Source: Springer Nature journal article supplement (https://www.springermedizin.de/resource/supplementary/13058_2013_3392_MOESM1_ESM.pdf/9704050)

|          | Low MTR                                                                            | Medium MTR                                                                          | High MTR                                                                             |
|----------|------------------------------------------------------------------------------------|-------------------------------------------------------------------------------------|--------------------------------------------------------------------------------------|
| Low PD   | 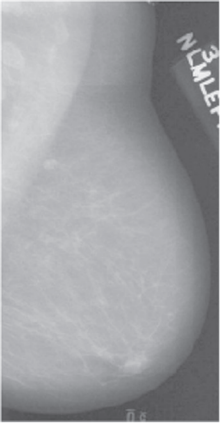    |     |     |
| Med . PD |   |   |   |
| High PD  |  |  |  |

Supplement: MOESM1 [file 9704050]
